# Supplementary material for: Tumor-infiltrating plasmacytoid dendritic cells are associated with survival in human colon cancer
Source: PubMed Central journal article supplement — J Immunother Cancer. 2021 Mar 24;9(3):e001813. doi: 10.1136/jitc-2020-001813 (PMC7993360; doi:10.1136/jitc-2020-001813), 2021-03-24
Supplement: jitc-2020-001813supp001.pdf [file jitc-2020-001813supp001.pdf]

**Supplementary Table 1.** Clinicopathological characteristics of colon cancer patients.

|                                     |             |
|-------------------------------------|-------------|
| <b>Age at resection (years)</b>     |             |
| Mean                                | 65.2        |
| Range                               | 15.4 – 93.8 |
| <b>Gender (n)</b>                   |             |
| Male                                | 82          |
| Female                              | 67          |
| <b>pT (n)</b>                       |             |
| pT1                                 | 9           |
| pT2                                 | 19          |
| pT3                                 | 85          |
| pT4                                 | 36          |
| <b>pN (n)</b>                       |             |
| pN0                                 | 72          |
| pN1                                 | 52          |
| pN2                                 | 25          |
| <b>pM (n)</b>                       |             |
| pM0                                 | 129         |
| pM1                                 | 20          |
| <b>Microsatellite stability (n)</b> |             |
| Microsatellite stable               | 126         |
| Microsatellite instable             | 23          |
| <b>Follow-up (months)</b>           |             |
| Mean                                | 48.0        |
| <b>Progression status (n)</b>       |             |
| Yes                                 | 51          |
| No                                  | 98          |
| <b>Survival status (n)</b>          |             |
| Alive                               | 113         |
| Dead                                | 36          |
