# Supplementary material for: Tumor-infiltrating plasmacytoid dendritic cells are associated with survival in human colon cancer
Source: PubMed Central journal article supplement — J Immunother Cancer. 2021 Mar 24;9(3):e001813. doi: 10.1136/jitc-2020-001813 (PMC7993360; doi:10.1136/jitc-2020-001813), 2021-03-24
Supplement: jitc-2020-001813supp002.pdf [file jitc-2020-001813supp002.pdf]

**Supplementary Table S2.** Antibodies used for multiparametric immunofluorescence stainings.

| <b>Antigen</b>  | <b>Clone</b>  | <b>Dilution</b> | <b>Source</b>            |
|-----------------|---------------|-----------------|--------------------------|
| CD3             | polyclonal    | 1:150           | Dako                     |
| CD4             | EPR6855       | 1:50            | Abcam                    |
| CD4             | SP35          | prediluted      | Ventana Medical Systems  |
| CD8             | C8/144B       | 1:100           | Dako                     |
| CD8             | SP57          | prediluted      | Ventana Medical Systems  |
| CD20            | L26           | 1:500/1:100     | Thermo Fisher Scientific |
| BDCA-2          | polyclonal    | 1:50/1:75       | R&D Systems              |
| FOXP3           | 236A/E7       | 1:100           | Abcam                    |
| pan-cytokeratin | AE1/AE3       | 1:100           | Thermo Fisher Scientific |
| pan-cytokeratin | AE1/AE3/PCK26 | prediluted      | Ventana Medical Systems  |
| GrzB            | Grb-7         | 1:50            | Dako                     |
| IRF7            | G-8           | 1:75            | Santa Cruz Biotechnology |
