# Supplementary figures and images for: Tumor-infiltrating plasmacytoid dendritic cells are associated with survival in human colon cancer
Source: PubMed Central journal article supplement — J Immunother Cancer. 2021 Mar 24;9(3):e001813. doi: 10.1136/jitc-2020-001813 (PMC7993360; doi:10.1136/jitc-2020-001813), 2021-03-24

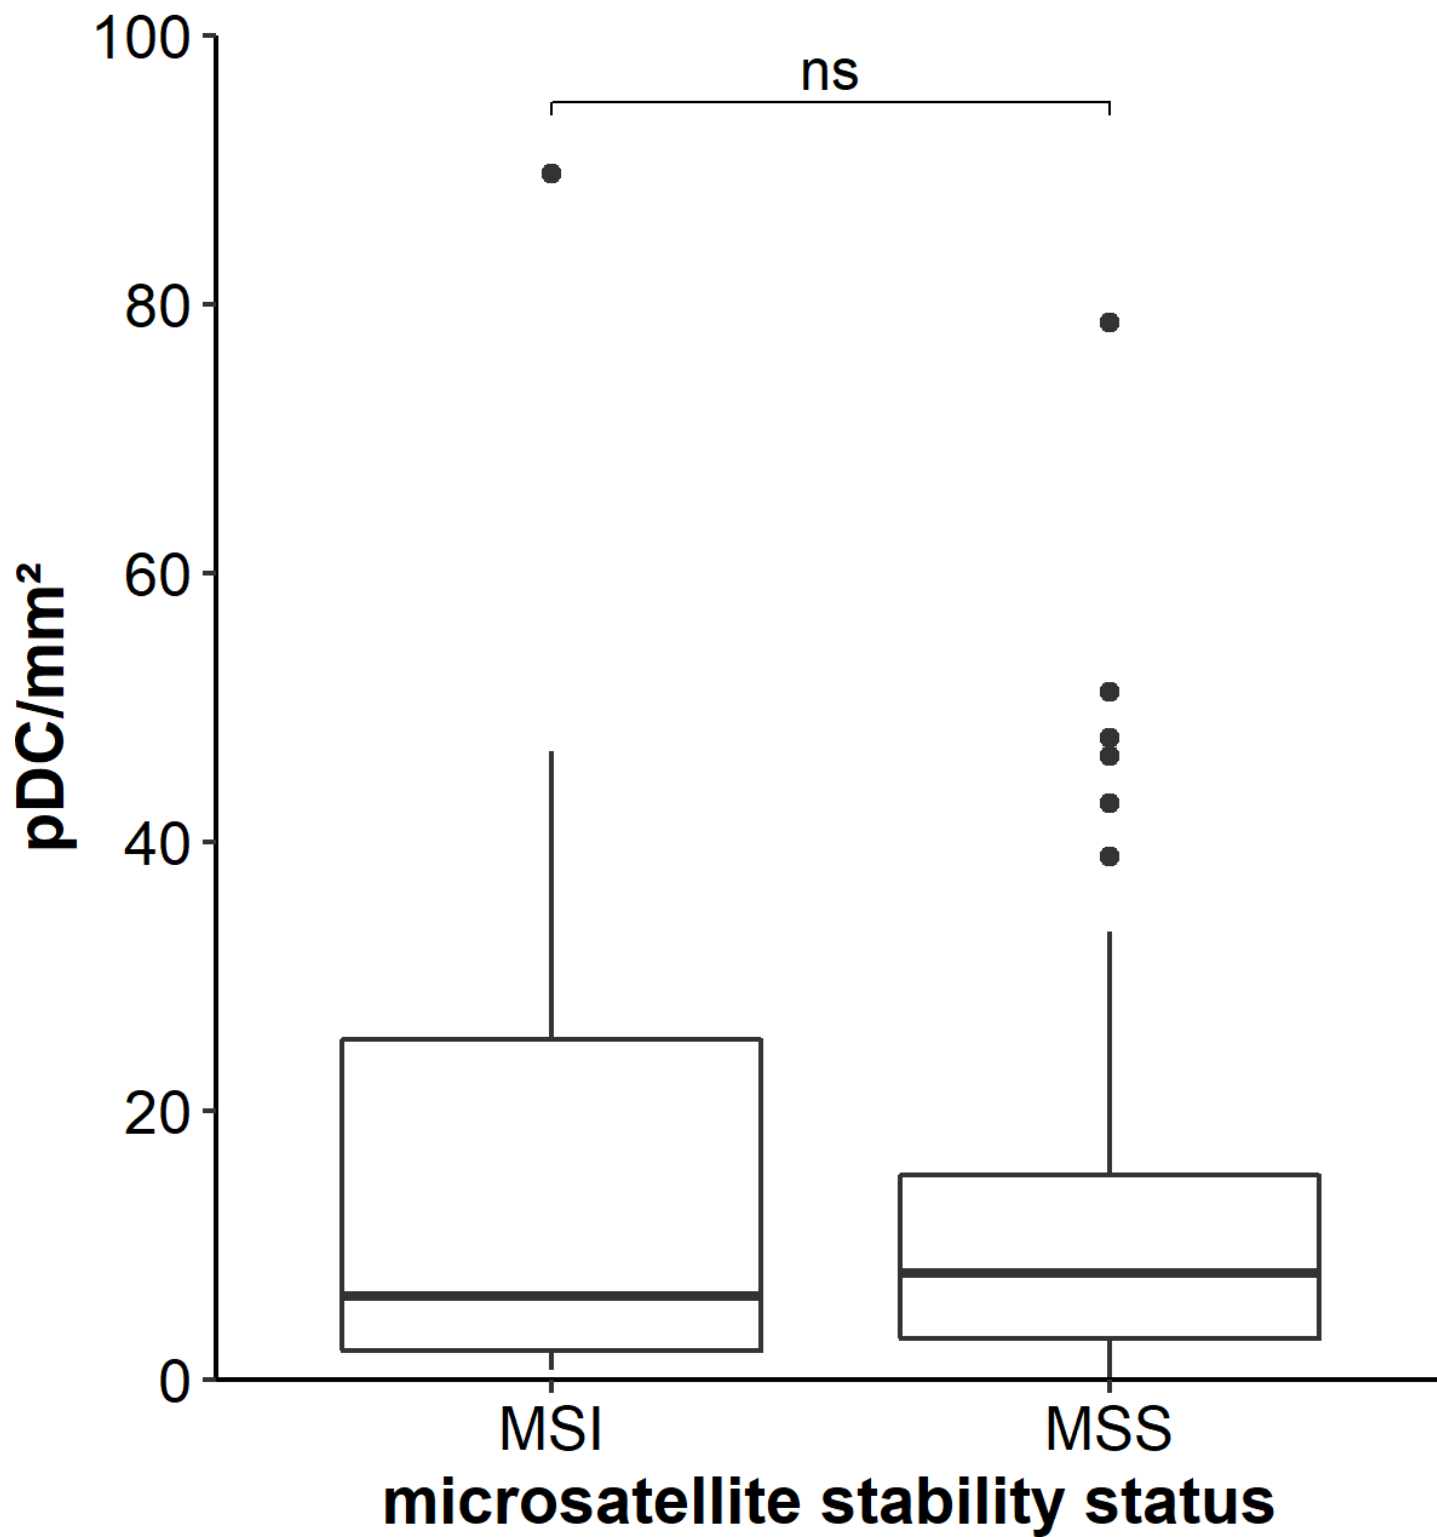

Supplement: jitc-2020-001813supp004.pdf [file jitc-2020-001813supp004.pdf]

— TLS density high — TLS density low

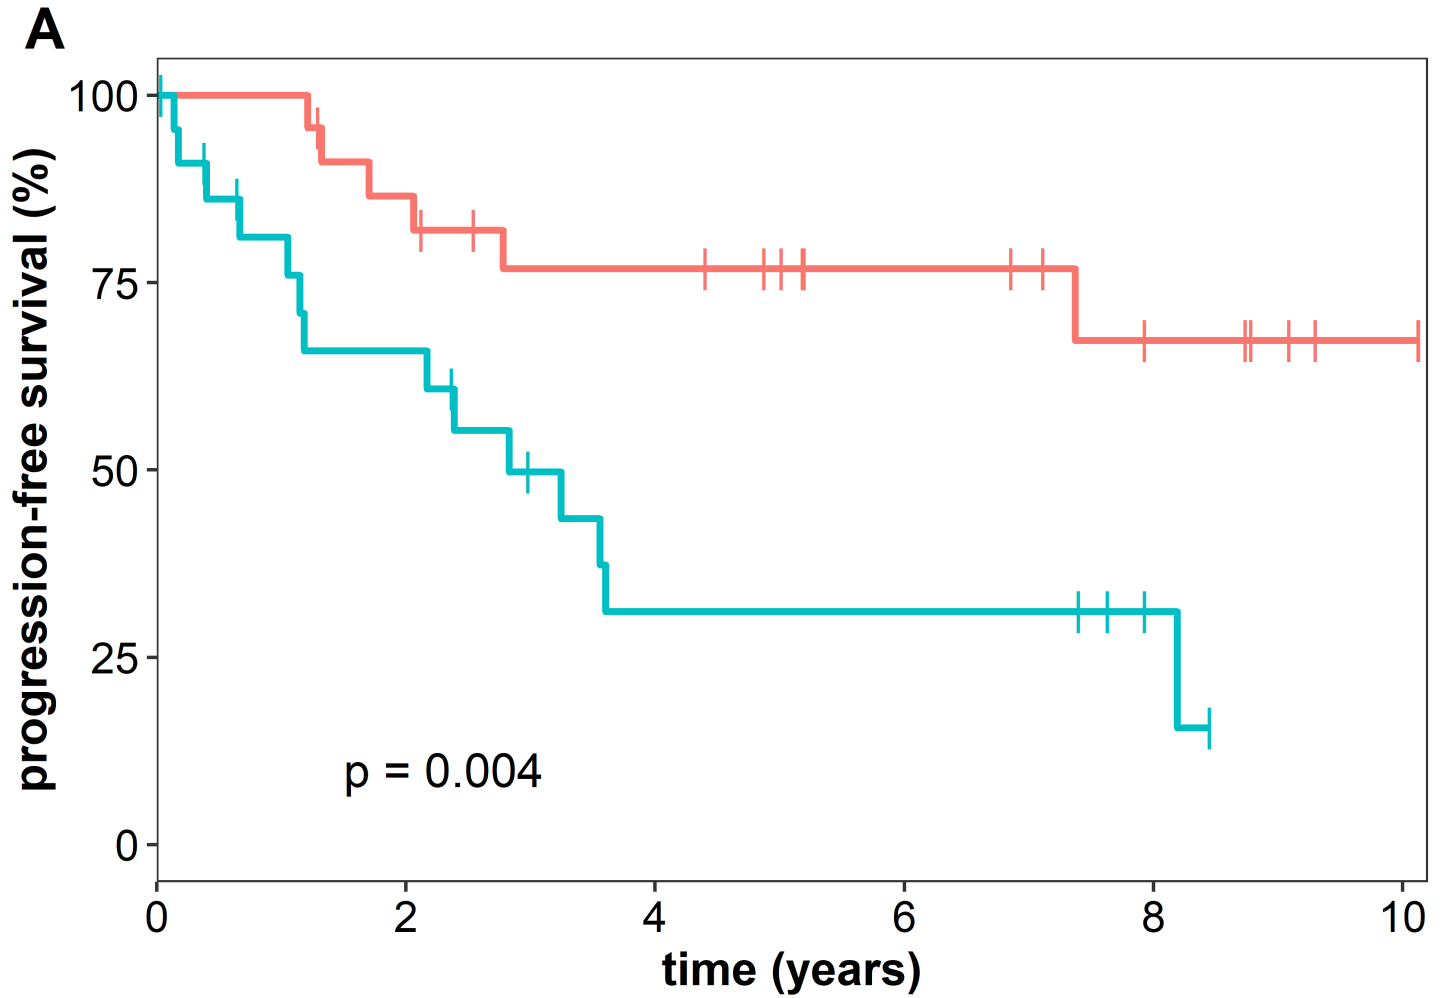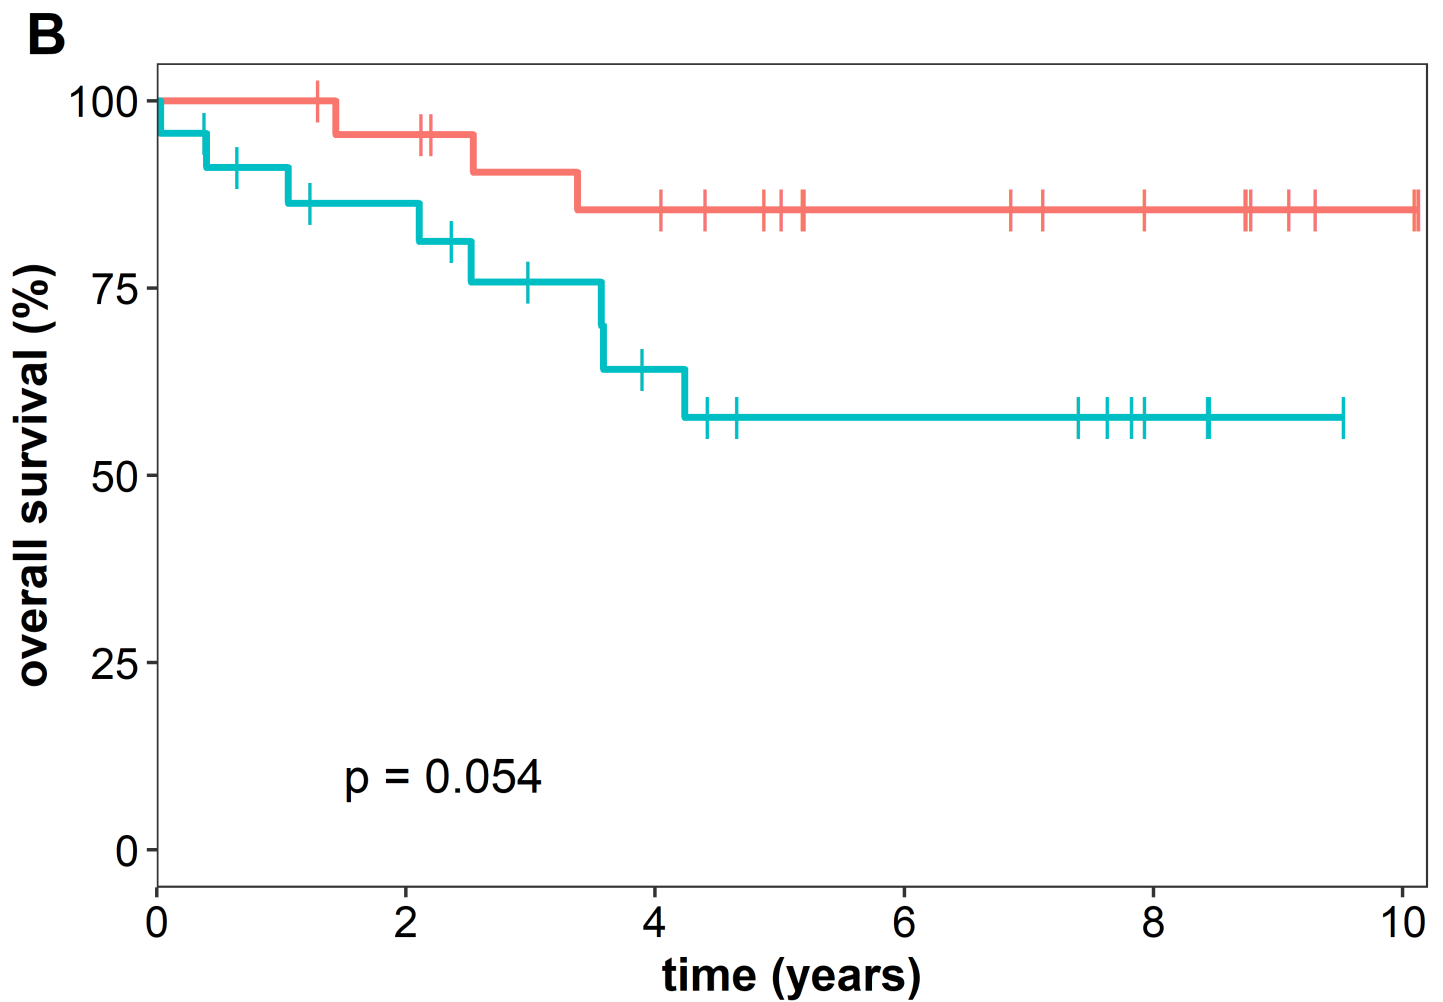

Supplement: jitc-2020-001813supp006.pdf [file jitc-2020-001813supp006.pdf]

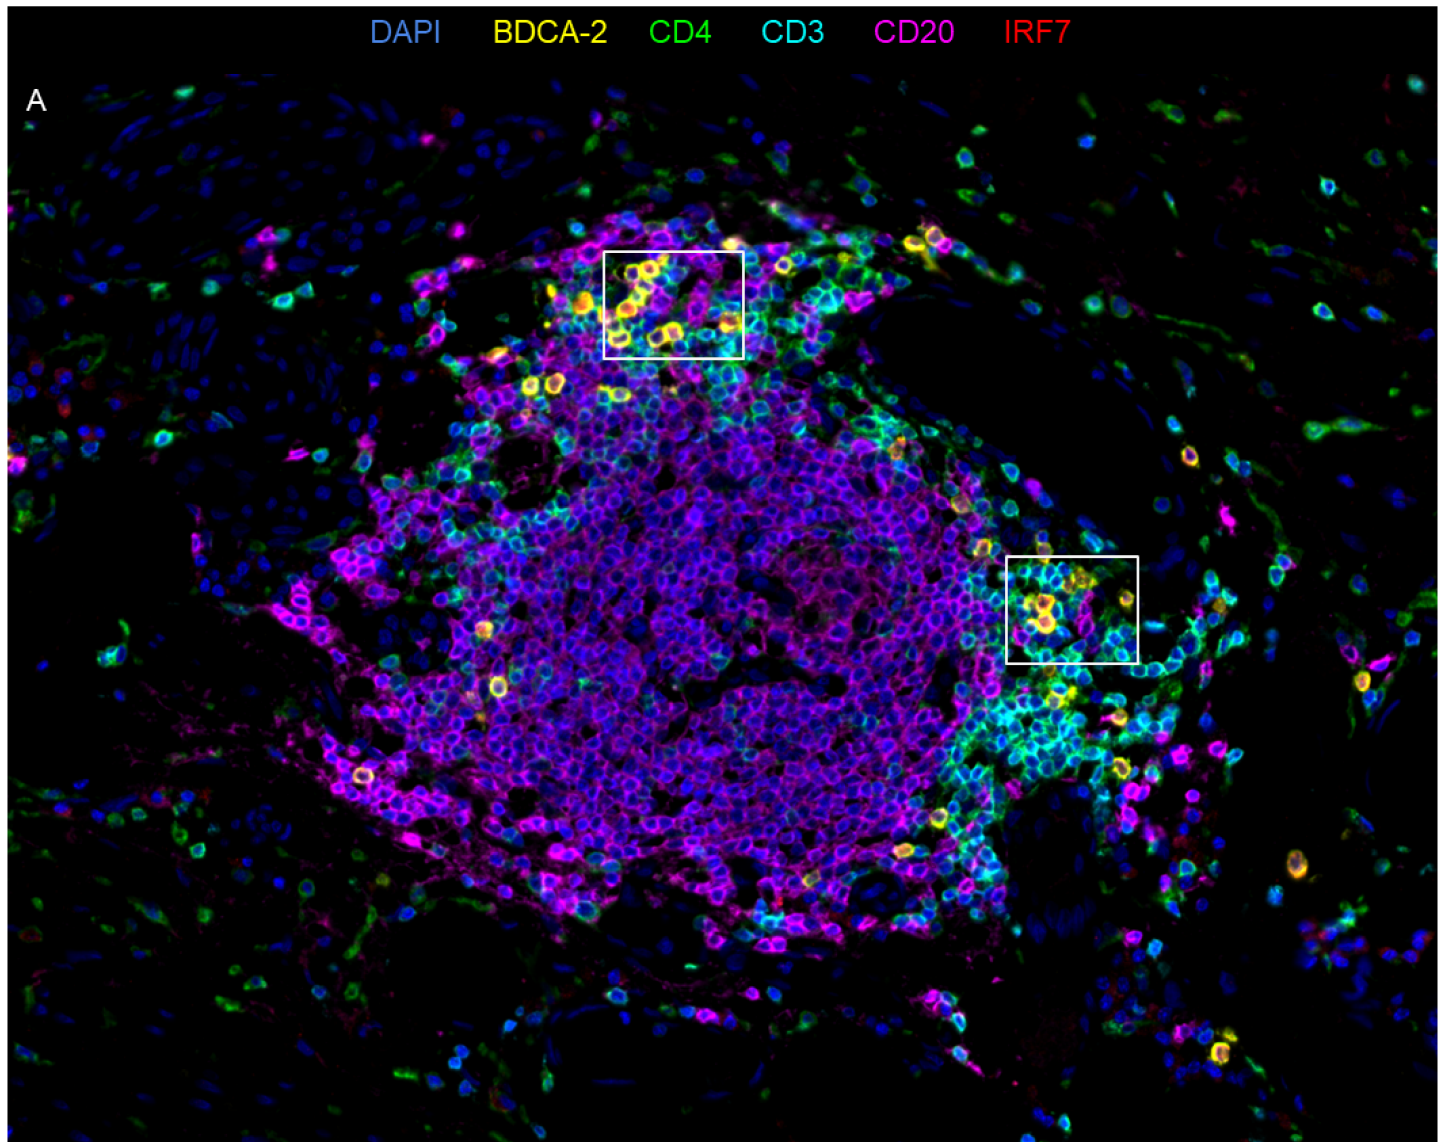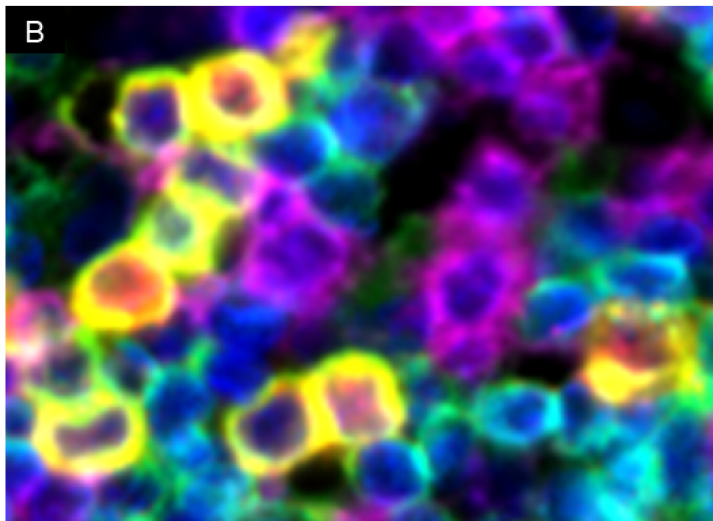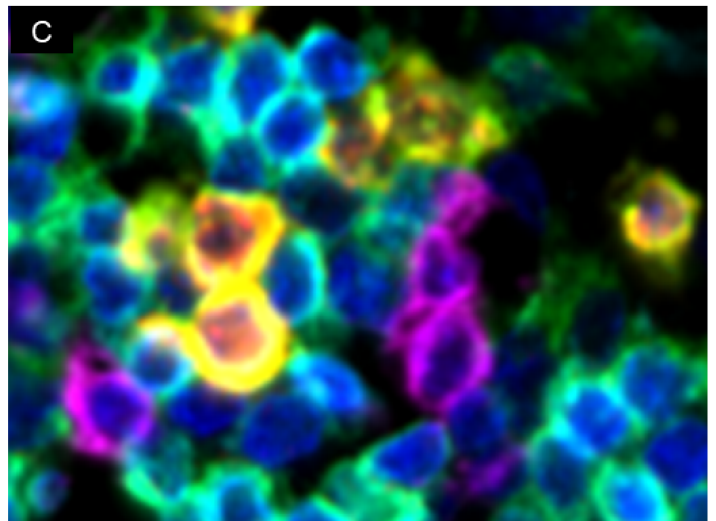

Supplement: jitc-2020-001813supp007.pdf [file jitc-2020-001813supp007.pdf]
