# Supplementary figures and images for: Tumor-infiltrating plasmacytoid dendritic cells are associated with survival in human colon cancer
Source: HighWire-hosted journal article supplement (doi:10.1136/jitc-2020-001813), 2021-03-01

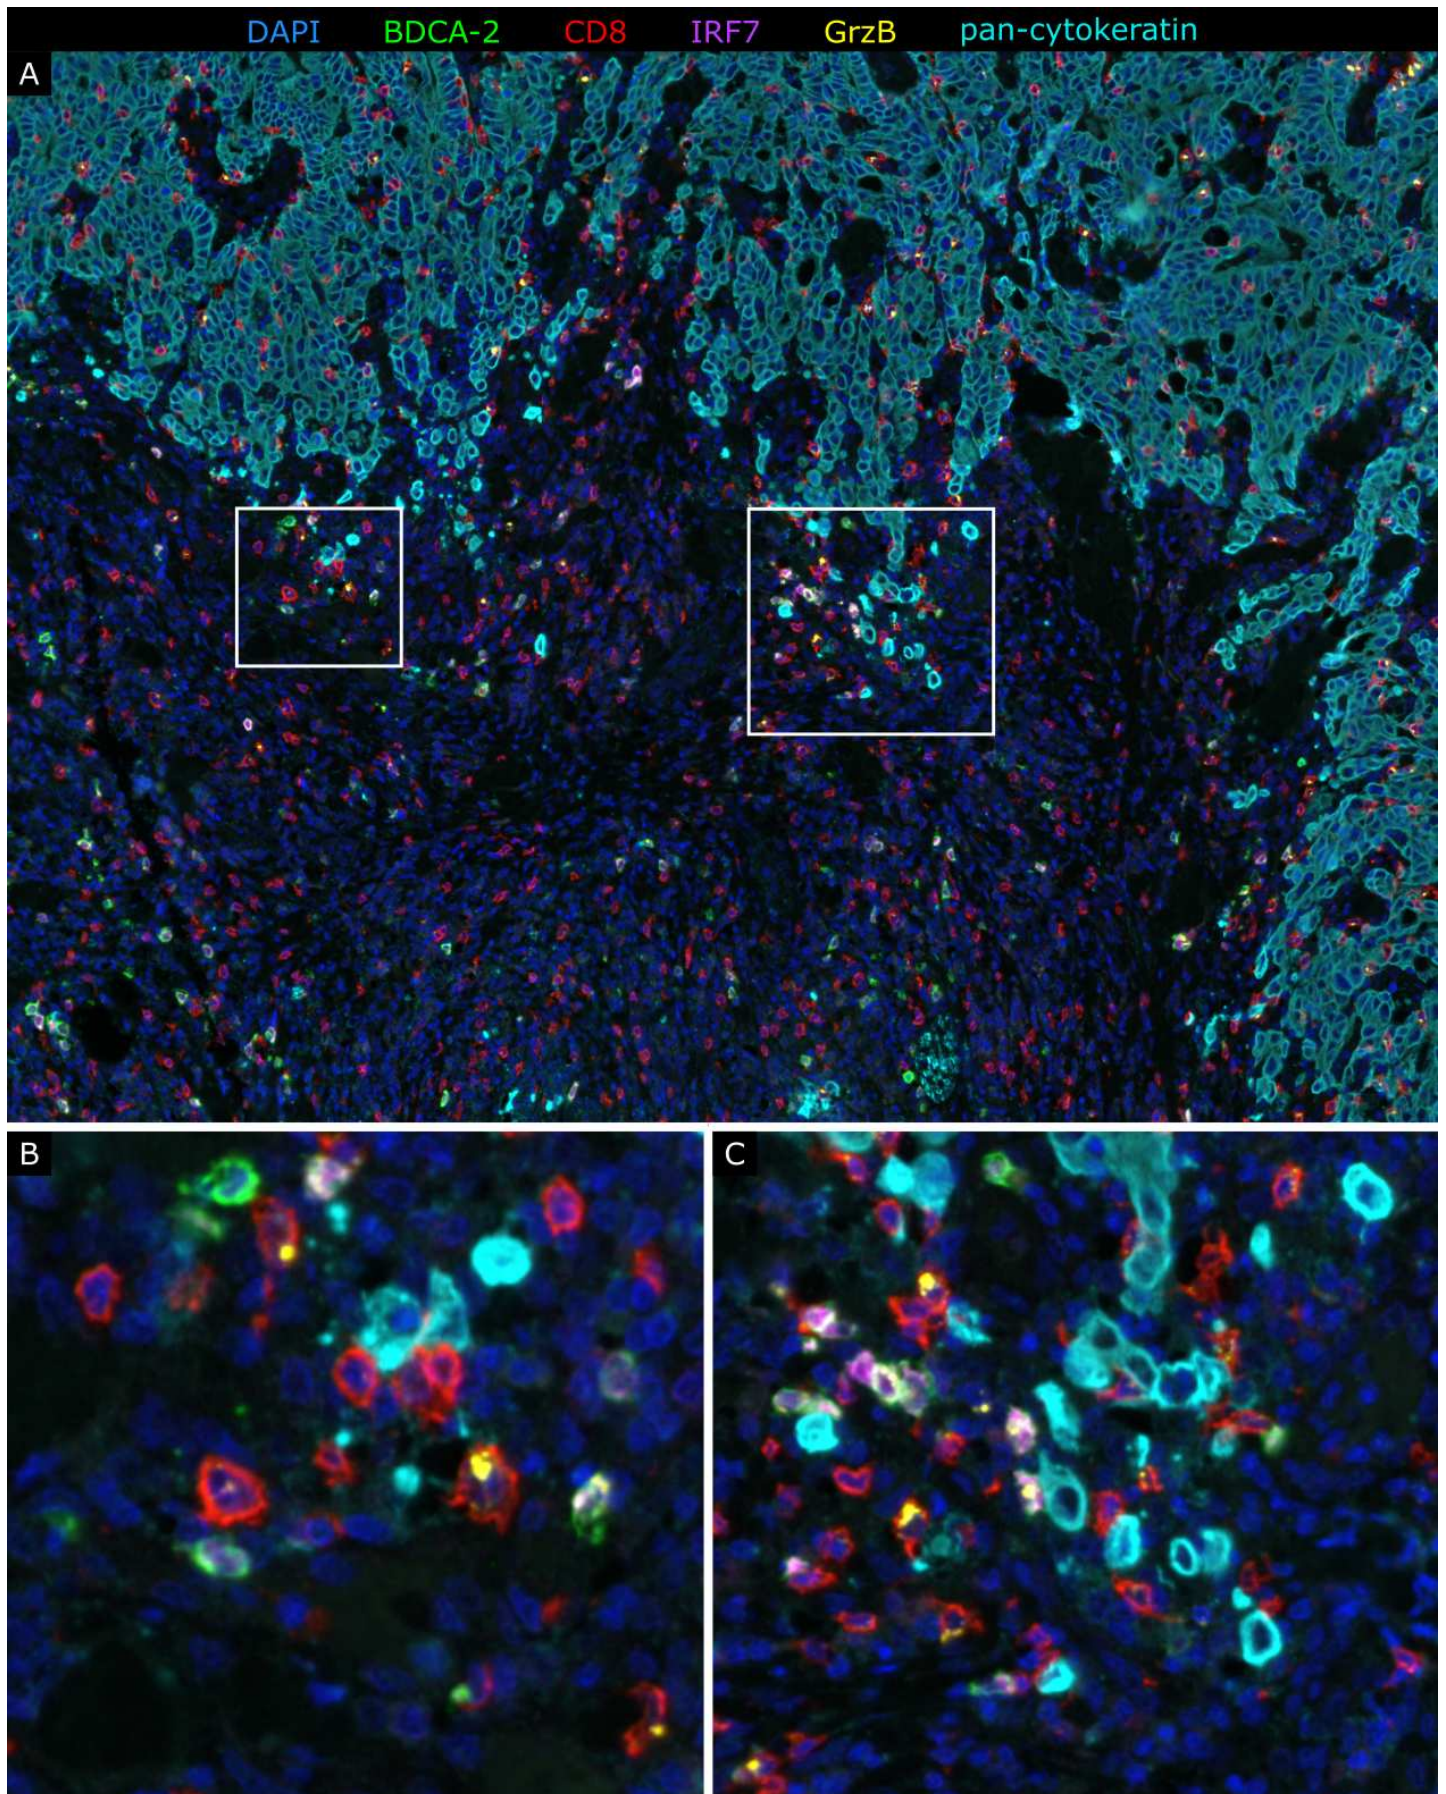

Supplement: jitc-2020-001813supp005_data_supplement.pdf [file jitc-2020-001813supp005_data_supplement.pdf]
